# Supplementary material for: Supplemented Very Low Protein Diet (sVLPD) in Patients with Advanced Chronic Renal Failure: Clinical and Economic Benefits
Source: MDPI journal article supplement (doi:10.3390/nu15163568), 2023-08-13
Supplement: s1 [file s1]

Supplementary material

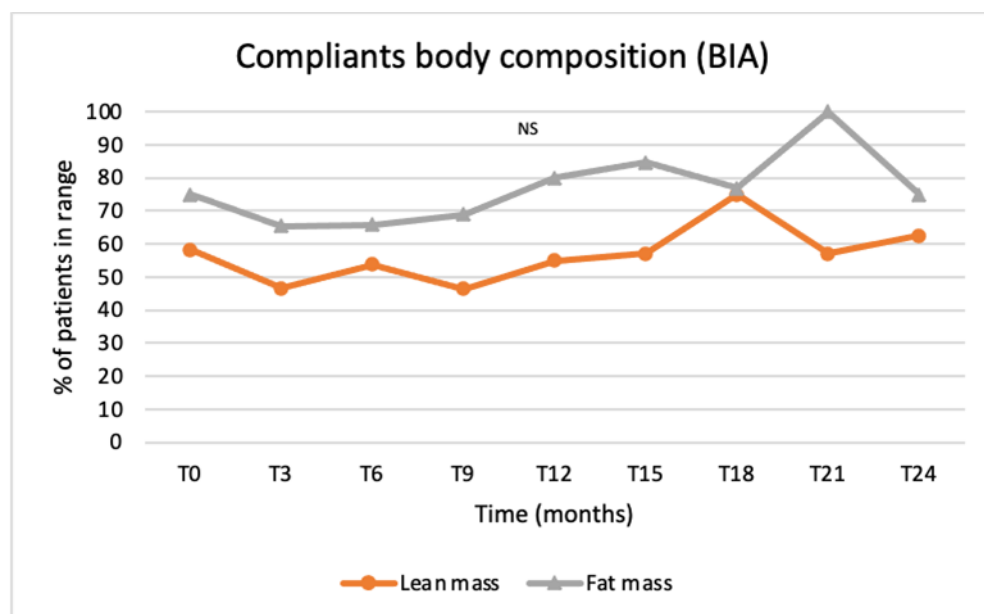

**Supplement Figure S1.** Percentage of patients on target for lean and fat mass during the observational period

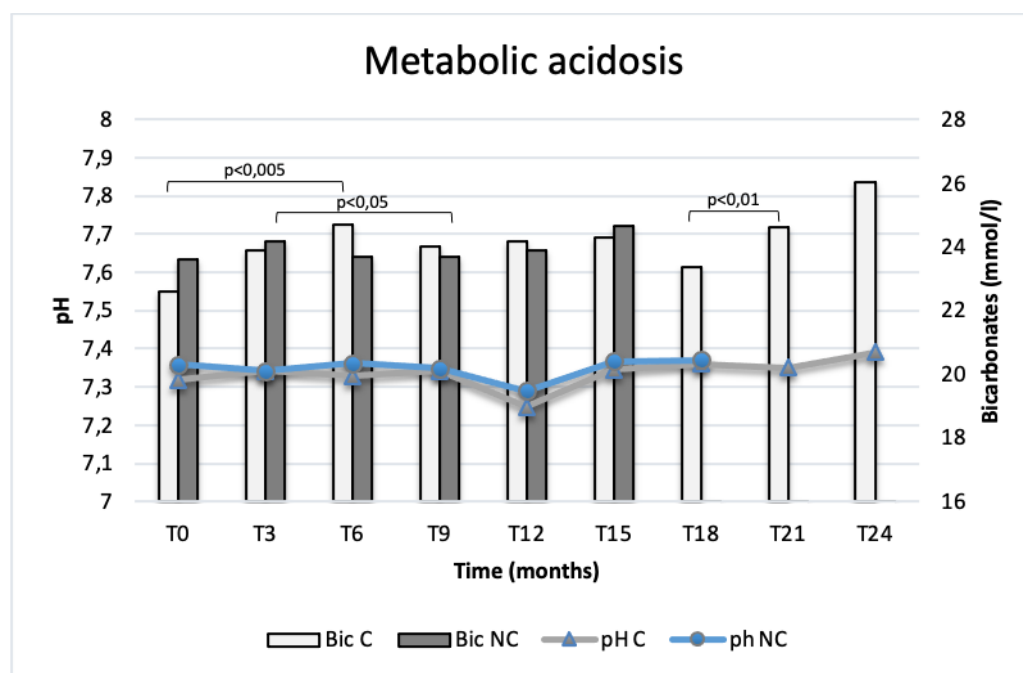

**Supplement Figure S2.** Mean values of pH and bicarbonates during observational period in Non-compliants (NC) vs Compliants (C).
